# Supplementary material
Source: PubMed Central journal article supplement (PMC5377784)
Supplement: 10.1074_M116.762161_jbc.M116.762161-1.pdf [file 10.1074_M116.762161_jbc.M116.762161-1.pdf]

## Functional characterization of CsBGlu12, a $\beta$ -glucosidase from *Crocus sativus* provides insights into its role in abiotic stress through accumulation of antioxidant flavonols

Shoib Ahmad Baba<sup>1,2</sup>, Ram A Vishwakarma<sup>3</sup>, Nasheeman Ashraf<sup>1,2,\*</sup>

<sup>1</sup>Plant Biotechnology Division, CSIR—Indian Institute of Integrative Medicine, Sanat Nagar, Srinagar, Jammu and Kashmir 190005, India

<sup>2</sup>Academy of Scientific and Innovative Research, CSIR—Indian Institute of Integrative Medicine, Canal Road, Jammu Tawi 180 001, India

<sup>3</sup>Medicinal Chemistry Division, CSIR-Indian Institute of Integrative Medicine, Canal Road, Jammu Tawi-180001, India

### Supplemental Information

**Supplemental Table S1:** List of substrates used for docking analysis, free energy change ( $\Delta G$ ) for best pose of the enzyme-ligand complex

| <b>Substrates</b>                           | <b>Free energy change (<math>\Delta G</math>) kcal/mol</b> |
|---------------------------------------------|------------------------------------------------------------|
| Cellobiose                                  | -8.71                                                      |
| Cellotriose                                 | -7.65                                                      |
| Cellotetraose                               | -6.34                                                      |
| Cellopentoase                               | -6.54                                                      |
| Kaempferol 3- <i>O</i> - $\beta$ -glucoside | -8.71                                                      |
| Quercetin 3- <i>O</i> - $\beta$ -glucoside  | -7.01                                                      |
| Naringenin 7- <i>O</i> - $\beta$ -glucoside | -5.8                                                       |
| Iridin                                      | -4.7                                                       |
| 1- <i>O</i> -Sinopyl- $\beta$ -D-glucoside  | -3.11                                                      |
| Esculin                                     | -2.1                                                       |
| Leucoseptoside                              | -1.98                                                      |
| Acteoside                                   | -1.76                                                      |
| Martynoside                                 | -1.82                                                      |
| Picrocrocin                                 | -1.32                                                      |

**Supplemental Table S2.** List of primer sequences used in the study.

---

| <b>Name of Primer</b>                        | <b>Sequence of Primer (5' to 3')</b> |
|----------------------------------------------|--------------------------------------|
| <b>Full Length primers</b>                   |                                      |
| CsBGlu-F                                     | ATGGGGTTCGCTACATCTCTC                |
| CsBGlu-R                                     | TTCTATTTCTTCAGAAATTTC                |
| <b>Primers for semi-quantitative PCR</b>     |                                      |
| CsSBG-F1                                     | TCACCTTGAACGAACCGTGGA                |
| CsSBG-R1                                     | CCTTGGTGTAGAGCAAG                    |
| <b>Primers for qRT-PCR</b>                   |                                      |
| QRT-F                                        | TGAACGAACCGTGAG                      |
| QRT-R                                        | CAGTGTGATGCCTATT                     |
| <b>Primers for bacterial expression</b>      |                                      |
| CsBGlu-PGex-F                                | GTCGACTTATGGGGTTCGCTACATCTCTC        |
| CsBGlu-PGex-R                                | GCGGCCGCTTCTATTTCTTCAGAAATTTC        |
| <b>Primers for site directed mutagenesis</b> |                                      |
| M1-F                                         | ACCTTGAACGCCCCGTGGAG                 |
| M1-R                                         | CTCCACGGGGCGTTCAAGGT                 |
| M2-F                                         | TACATCACAGCCAATGGTGTC                |
| M2-R                                         | GACACCATTGGCTGTGATGTA                |
| <b>Primers for PBI121 cloning</b>            |                                      |
| CsBGluPBI-F                                  | AATCTAGAATGGGGTTCGCTACATCTCTC        |
| CsBGluPBI-R                                  | AAGGAGCTCTATTTCTTCAGAAATTTC          |
| <b>Primers for PAM-PAT-35S-YFP</b>           |                                      |
| YFP-F                                        | GAGCTCATGGGGTTCGCTACATCTCTC          |
| YFP-R                                        | AAGCTTGTCTATTTCTTCAGAAATTTC          |
| <b>18S primers</b>                           |                                      |
| 18S-F                                        | GTAACCCGTTGAACCCATT                  |
| 18S-R                                        | CCATCCAATCGGTAGTAGCG                 |
| <b>GAPDH primers</b>                         |                                      |
| GAPDH-F                                      | ATAGCTTATTATTAGACGGA                 |
| GAPDH-R                                      | CTCAAGGGAATCATGGGCT                  |

---

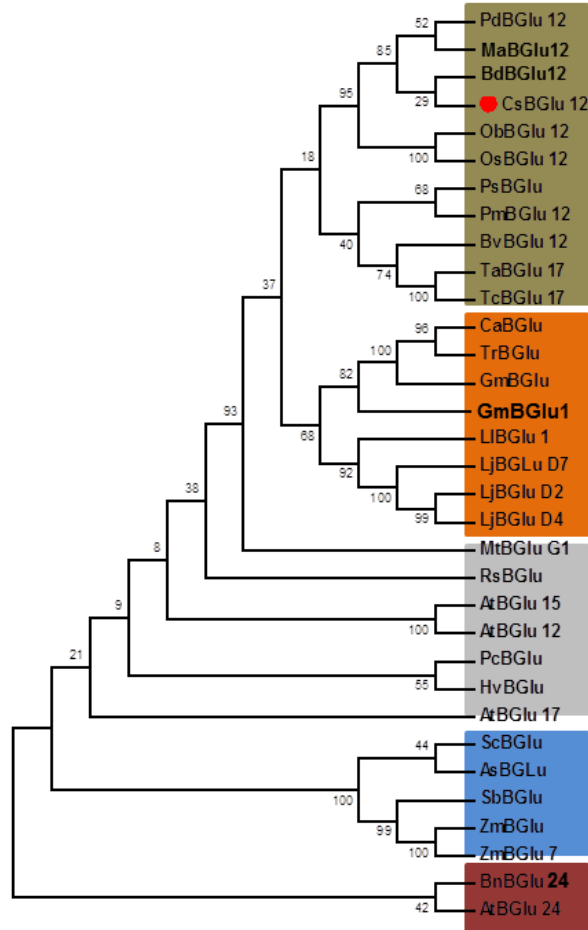

**Supplemental Figure S1:** Phylogenetic tree of *CsBGLu12*. The phylogenetic tree was developed using the Neighbor-Joining method by MEGA software (Tamura et al., 2013). The protein sequences used for the analysis include *Crocus sativus* *CsBGLu12* (KX790358), *Medicago truncatula* *MtBGLuG1* (CM001222.2), *Arabidopsis thaliana* *AtBGLu15* (O64879.1), *AtBGLu17* (O64882.1), *AtBGLu12* (Q9FH03.1), *AtBGLu24* (Q9LKR7.2), *Lotus Japonica* *LjBGLuD2* (ACD65510.1), *LjBGLuD4* (ACD65509.2), *LjBGLuD7* (ACD65511.1), *Glycine max* *GmBGLu* (XP\_006590951.1), *GmBGLu1* (BAF34333.1) *Leucaena leucocephala* *LIBGLu1* (EU328158.1), *Phoenix dactylifera* *PdBGLu12* (XP\_008775422), *Brachypodium distachyon* *BdBGLu12* (XP\_003563902), *Oryza brachyantha* *ObBGLu12* (XP\_006656039), *Musa acuminata* *MaBGLu12* (XP\_009410330), *Theobroma cacao* *TcBGLu17* (XP\_007014814), *Prunus mume* *PmBGLu12* (XP\_008230315), *Beta vulgaris* *BvBGLu12* (XP\_010673565), *Brassica napus* *BnGlu24* (CAA42775.1), *Zea mays* *ZmBGLu* (CAA52293.1), *Cicer arietinum* *CaBGLu* (CAG14979.1), *Trifolium repens* *TrBGLu* (CAA40058.1), *Prunus serotina* *PsBGLu* (AAF34650.1), *Rauvolfia serpentina* *RsBGLu* (CAC83098.1), *Pinus contorta* *PcBGLu* (AAC69619.1), *Sorghum bicolor* *SbBGLu* (AAC49177.1), *Secale cereale* *ScBGLu* (AAG00614.1), *Avena sativa* *AsBGLu* (AAD02839.1), *Hordeum vulgare* *HvBGLu* (AAA87339.1) and *Oryza sativa* *Os4BGLu12* (Q7XKV4.2).

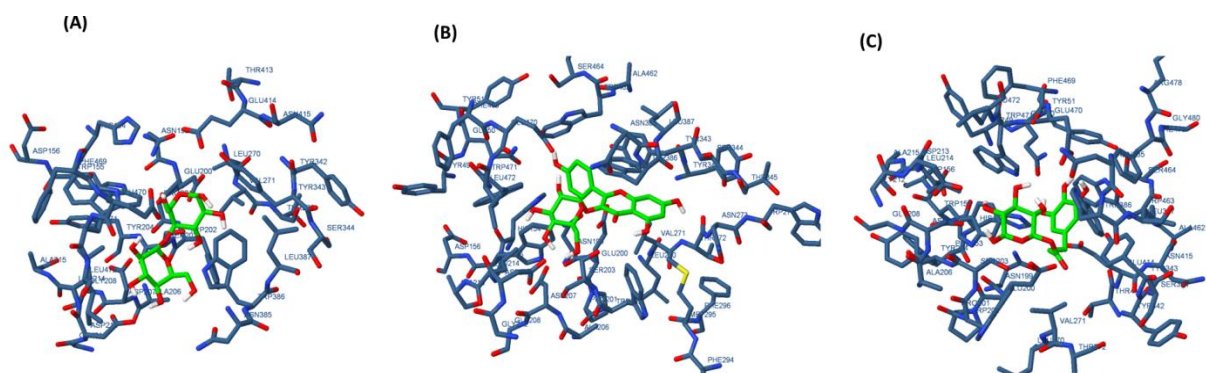

**Supplemental Figure S2:** Docking analysis of CsBGlu12. The analysis was carried out with all the substrates using DockingServer (<http://www.dockingserver.com>). However, only representative substrates are shown here which docked in the active site of CsBGlu12 (A) cellobiose (B) Kaempferol 3-O-β-glucoside and (C) 1-O-sinopyl-β-D-glucoside.

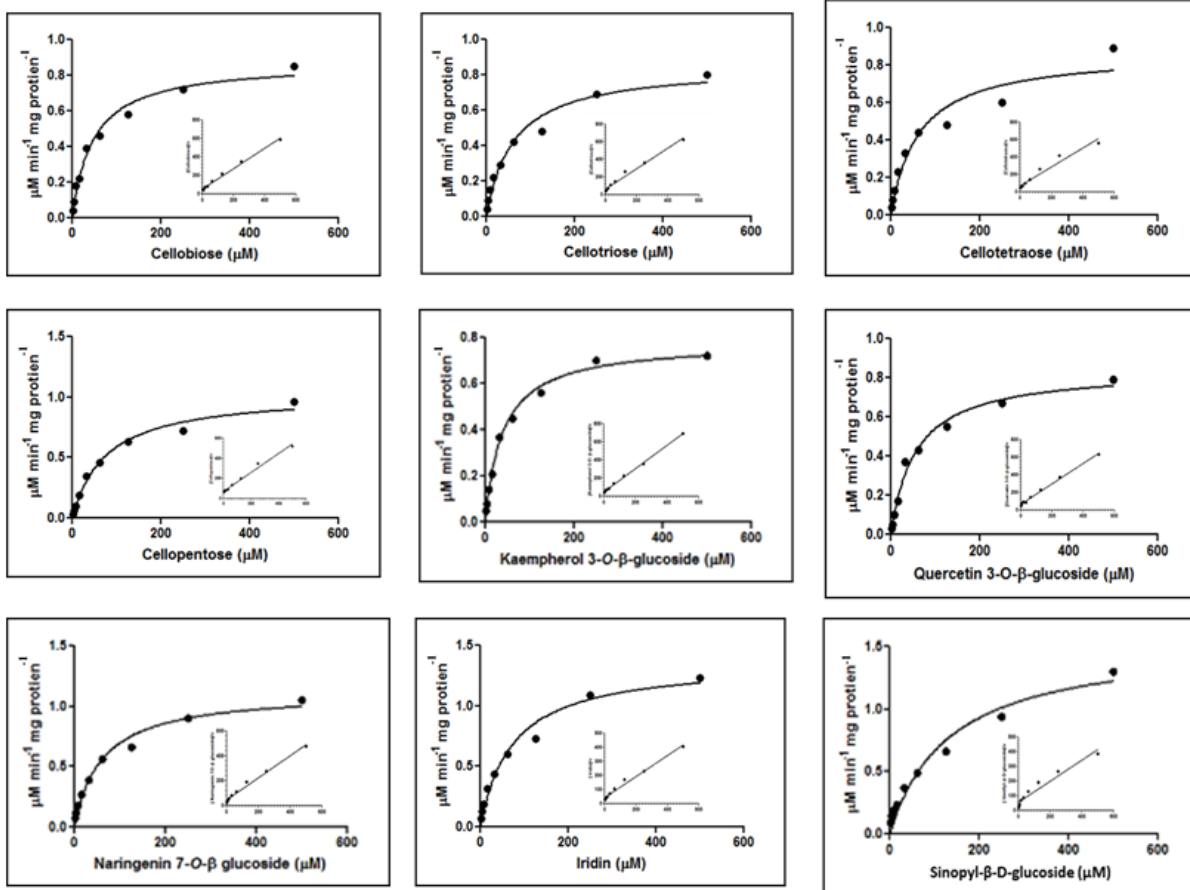

**Supplemental Figure S3: Michaelis-Menten and Hanes-Woolf plot analyses of CsBGlu12 activity.** Activity was measured using different substrates at varying substrate concentrations (1.9 to 500  $\mu\text{M}$ ). For each substrate, the main graph represents the velocity versus substrate concentration; inside is a Hanes-Woolf plot of the mean values. All values are means of three replicates  $\pm$  SD

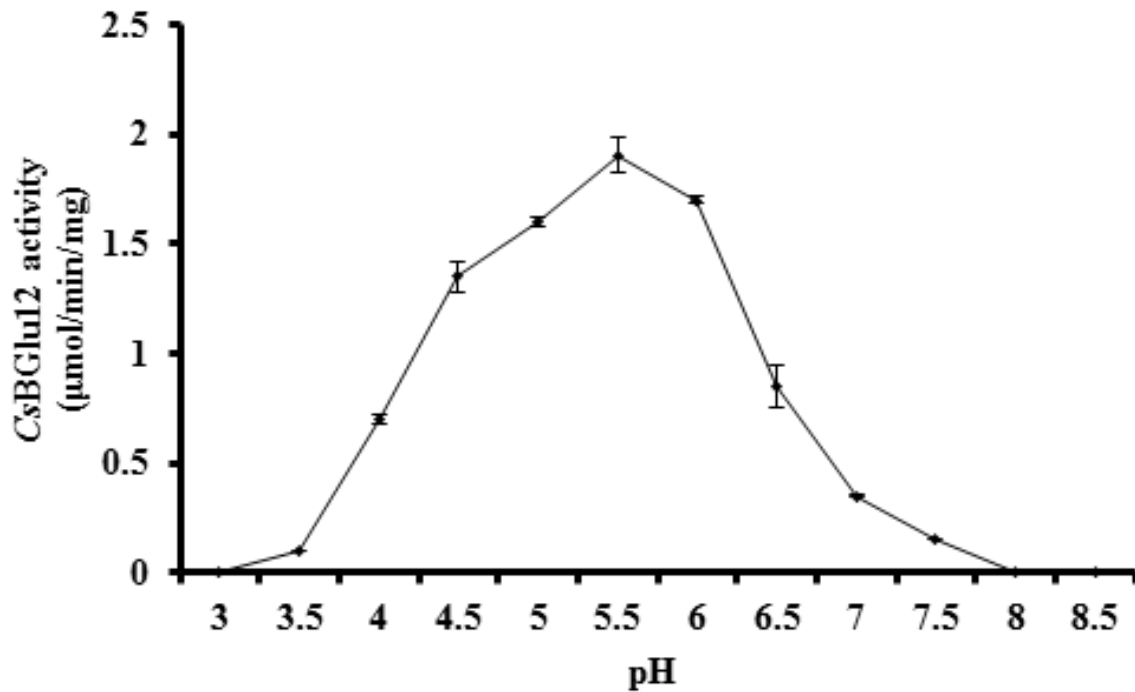

**Supplemental Figure S4:** Dependence of recombinant *CsBGlu12* activity on assay pH. Activity was measured using assay in presence of 500 μM cellobiose and a 15 min incubation period. For the pH profile, assays were buffered in 100 mM universal buffer and pH 3-8.5 with 0.5 pH unit increments. All values represent the mean ± SD of three independent determinations using a typical recombinant *CsBGlu 12*.

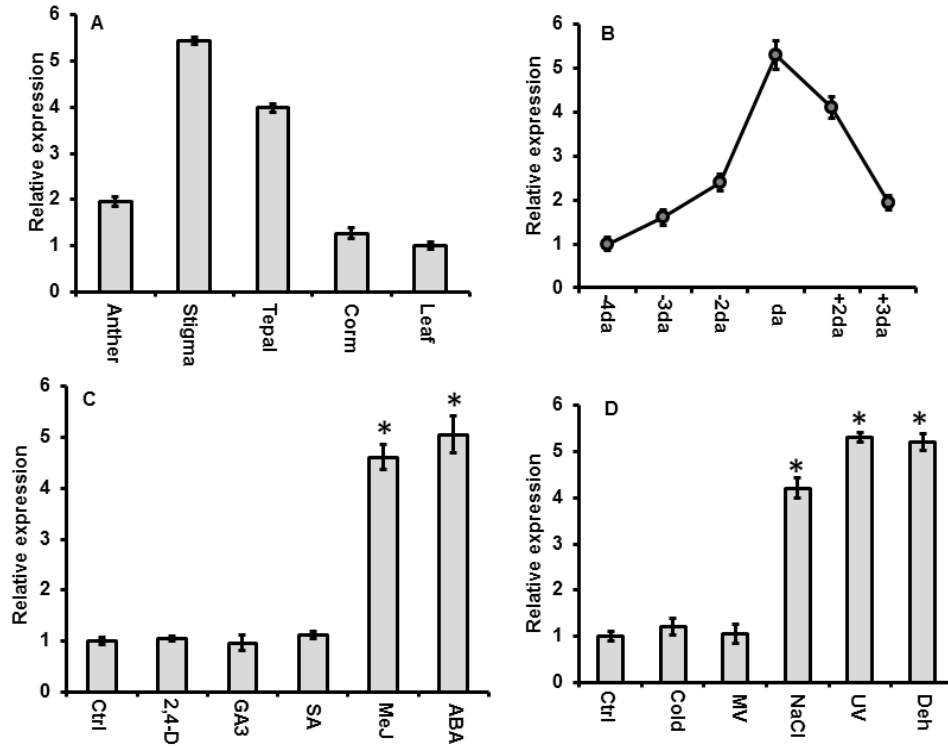

**Supplemental Figure S5:** Expression pattern of CsBGlu12. Expression of CsBGlu12 was determined using quantitative real time PCR (A) different tissues (B) different developmental stages of flower, four days before anthesis (-4da), three days before anthesis (-3da), two days before anthesis (-2da), day of anthesis (da), two days after anthesis (+2da) and three days after anthesis (C) hormonal treatments, Ctrl (control), MeJ (methyl jasmonate), 2,4-D (2, 4-dichlorophenoxyacetic acid), ABA (abscisic acid), SA (salicylic acid), GA3 (gibberellic acid) (D) stress treatments, NaCl (sodium chloride), UV (ultraviolet-B), MV (methylviologen), Dehd (dehydration) and cold (4°C). GAPDH was used as endogenous control. Experiment was done in triplicates.

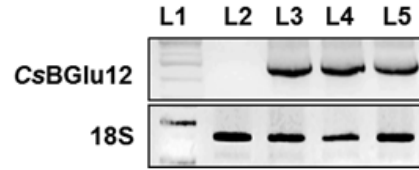

**Supplemental Figure S6:** Semiquantitative RT-PCR of CsBGlu12 in transient overexpression lines of *N. Benthamiana*. L1: Marker; L2: uninoculated (UI); L3: CsBGlu12 overexpression line; L4: M1 overexpression line and L5: M2 overexpression line. The reaction mixture for each sample contained 10 mM Tris HCl pH 9.0, 50 mM KCl, 2.5 mM MgCl<sub>2</sub>, 200 mM dNTP, 1 mM primers (Table S1), 25 ng of cDNA template, and 0.5 U of Taq DNA polymerase (Fermentas). The PCR conditions were as follows: one cycle 95°C for 1 min, 27 cycles of 94°C for 30 s, 57°C for 30 s and 72°C for 1.5 min. The samples were run on 1.5% agarose gel and visualized under gel doc (Bio-Rad).

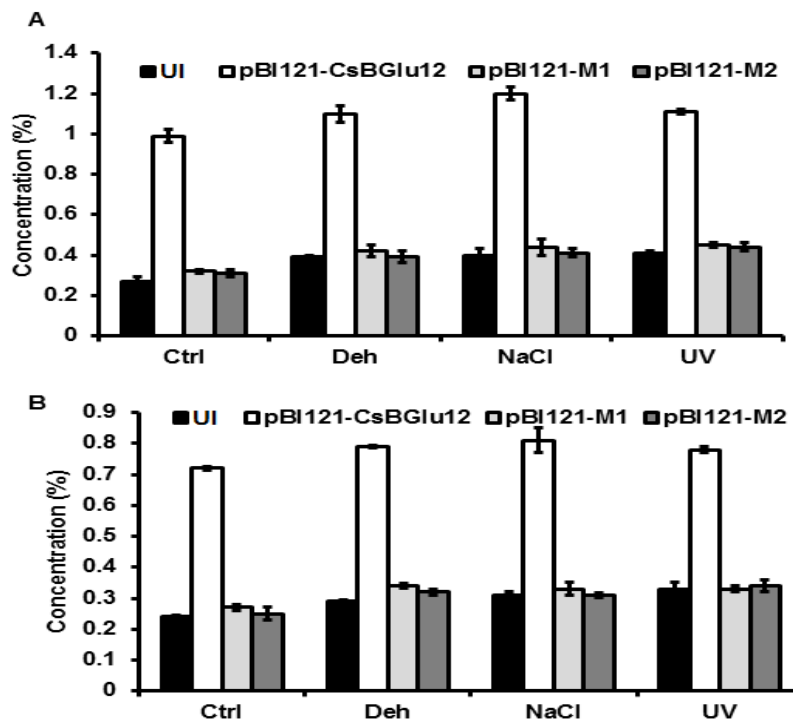

**Supplemental Figure S7:** Quantification of flavonols (a) Kaempferol (B) Quercetin in *N. benthamiana* plants subjected to different stress conditions: NaCl (sodium chloride), UV (ultraviolet-B), MV (methylviologen), Dehyd (dehydration) and cold (4°C).
